# Supplementary material for: A stimulus to define informatics and health information technology
Source: Springer Nature journal article supplement (doi:10.1186/1472-6947-9-24), 2009-05-15
Supplement: 12911_2009_266_MOESM2_ESM.pdf [file 12911_2009_266_MOESM2_ESM.pdf]

**Health and biological sciences:**

- Medicine, nursing, etc.
- Public health
- Biology

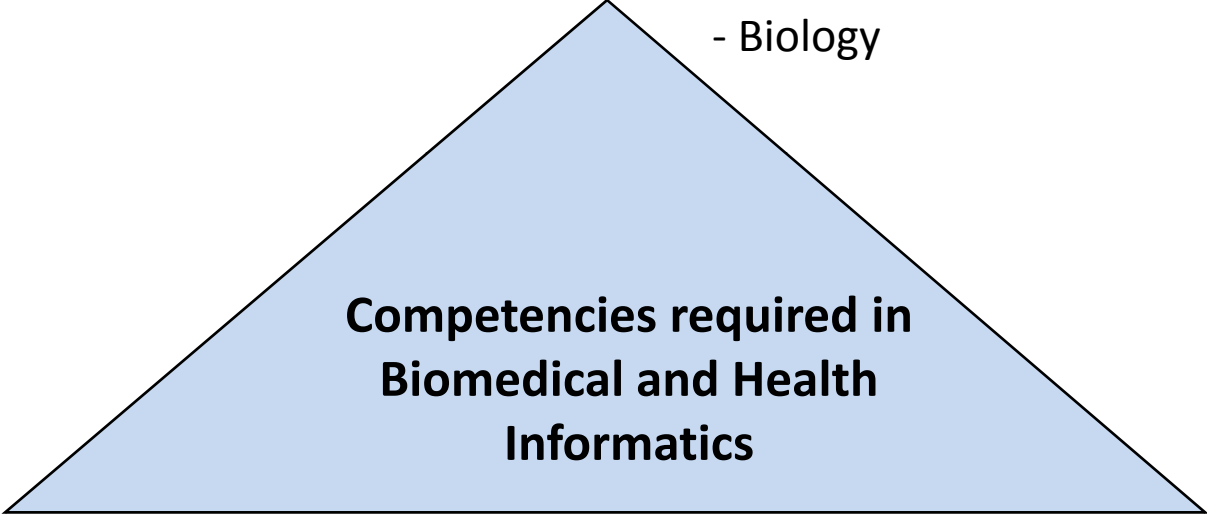

**Competencies required in  
Biomedical and Health  
Informatics**

**Management and social sciences:**

- Business administration
- Human resources
- Organizational behavior

**Computational and mathematical sciences:**

- Computer science
- Information technology
- Statistics
