# Supplementary material for: A stimulus to define informatics and health information technology
Source: Springer Nature journal article supplement (doi:10.1186/1472-6947-9-24), 2009-05-15
Supplement: 12911_2009_266_MOESM3_ESM.pdf [file 12911_2009_266_MOESM3_ESM.pdf]

Health care professions, e.g.,  
medicine, nursing, etc.

Natural and life sciences, e.g.,  
biology, genetics, etc.

Computer science (CS), IT, and  
undergraduate informatics

Health information  
management (HIM)

Others, e.g., business, library  
and information science

Graduate-  
level  
biomedical  
informatics  
education

Jobs in:

- Health care systems
- Biomedical research
- Industry
- Academia
- Others
