# Supplementary figures and images for: A stimulus to define informatics and health information technology
Source: Springer Nature journal article supplement (doi:10.1186/1472-6947-9-24), 2009-05-15

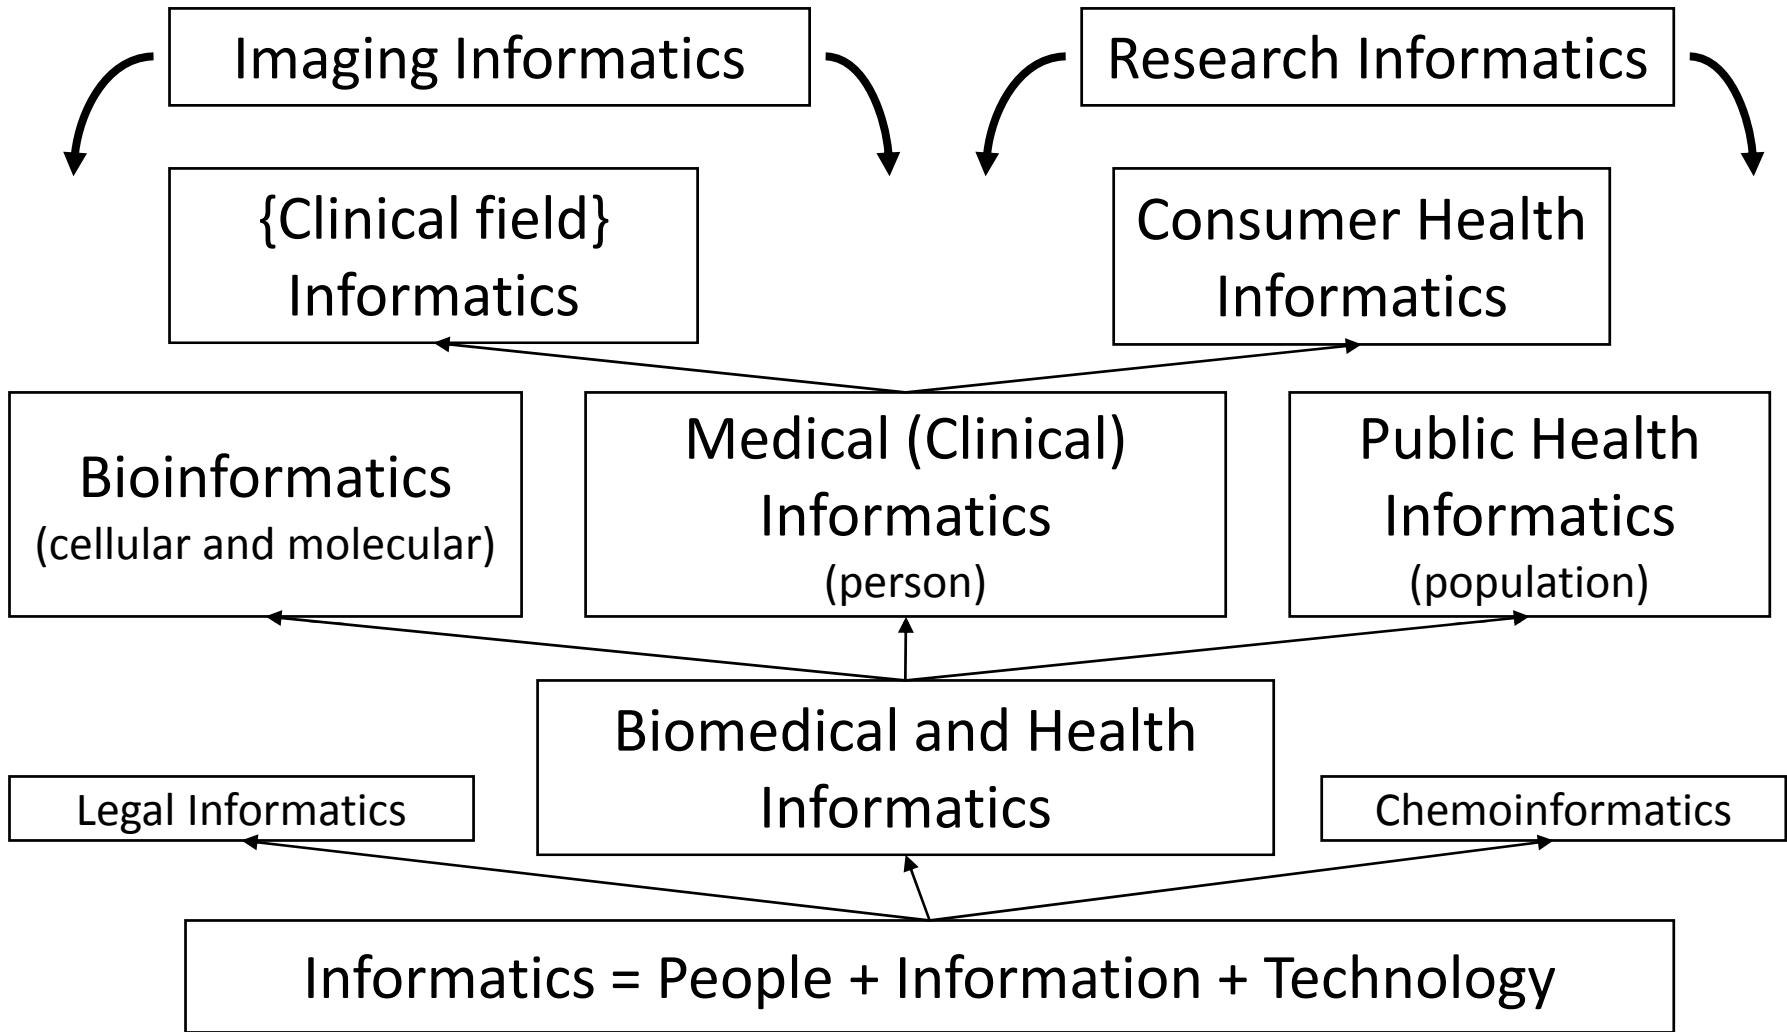

Supplement: 12911_2009_266_MOESM1_ESM.pdf [file 12911_2009_266_MOESM1_ESM.pdf]
